# Supplementary material for: The oldest record of the Steller sea lion Eumetopias jubatus (Schreber, 1776) from the early Pleistocene of the North Pacific
Source: PeerJ journal article supplement (doi:10.7717/peerj.9709), 2020-08-27

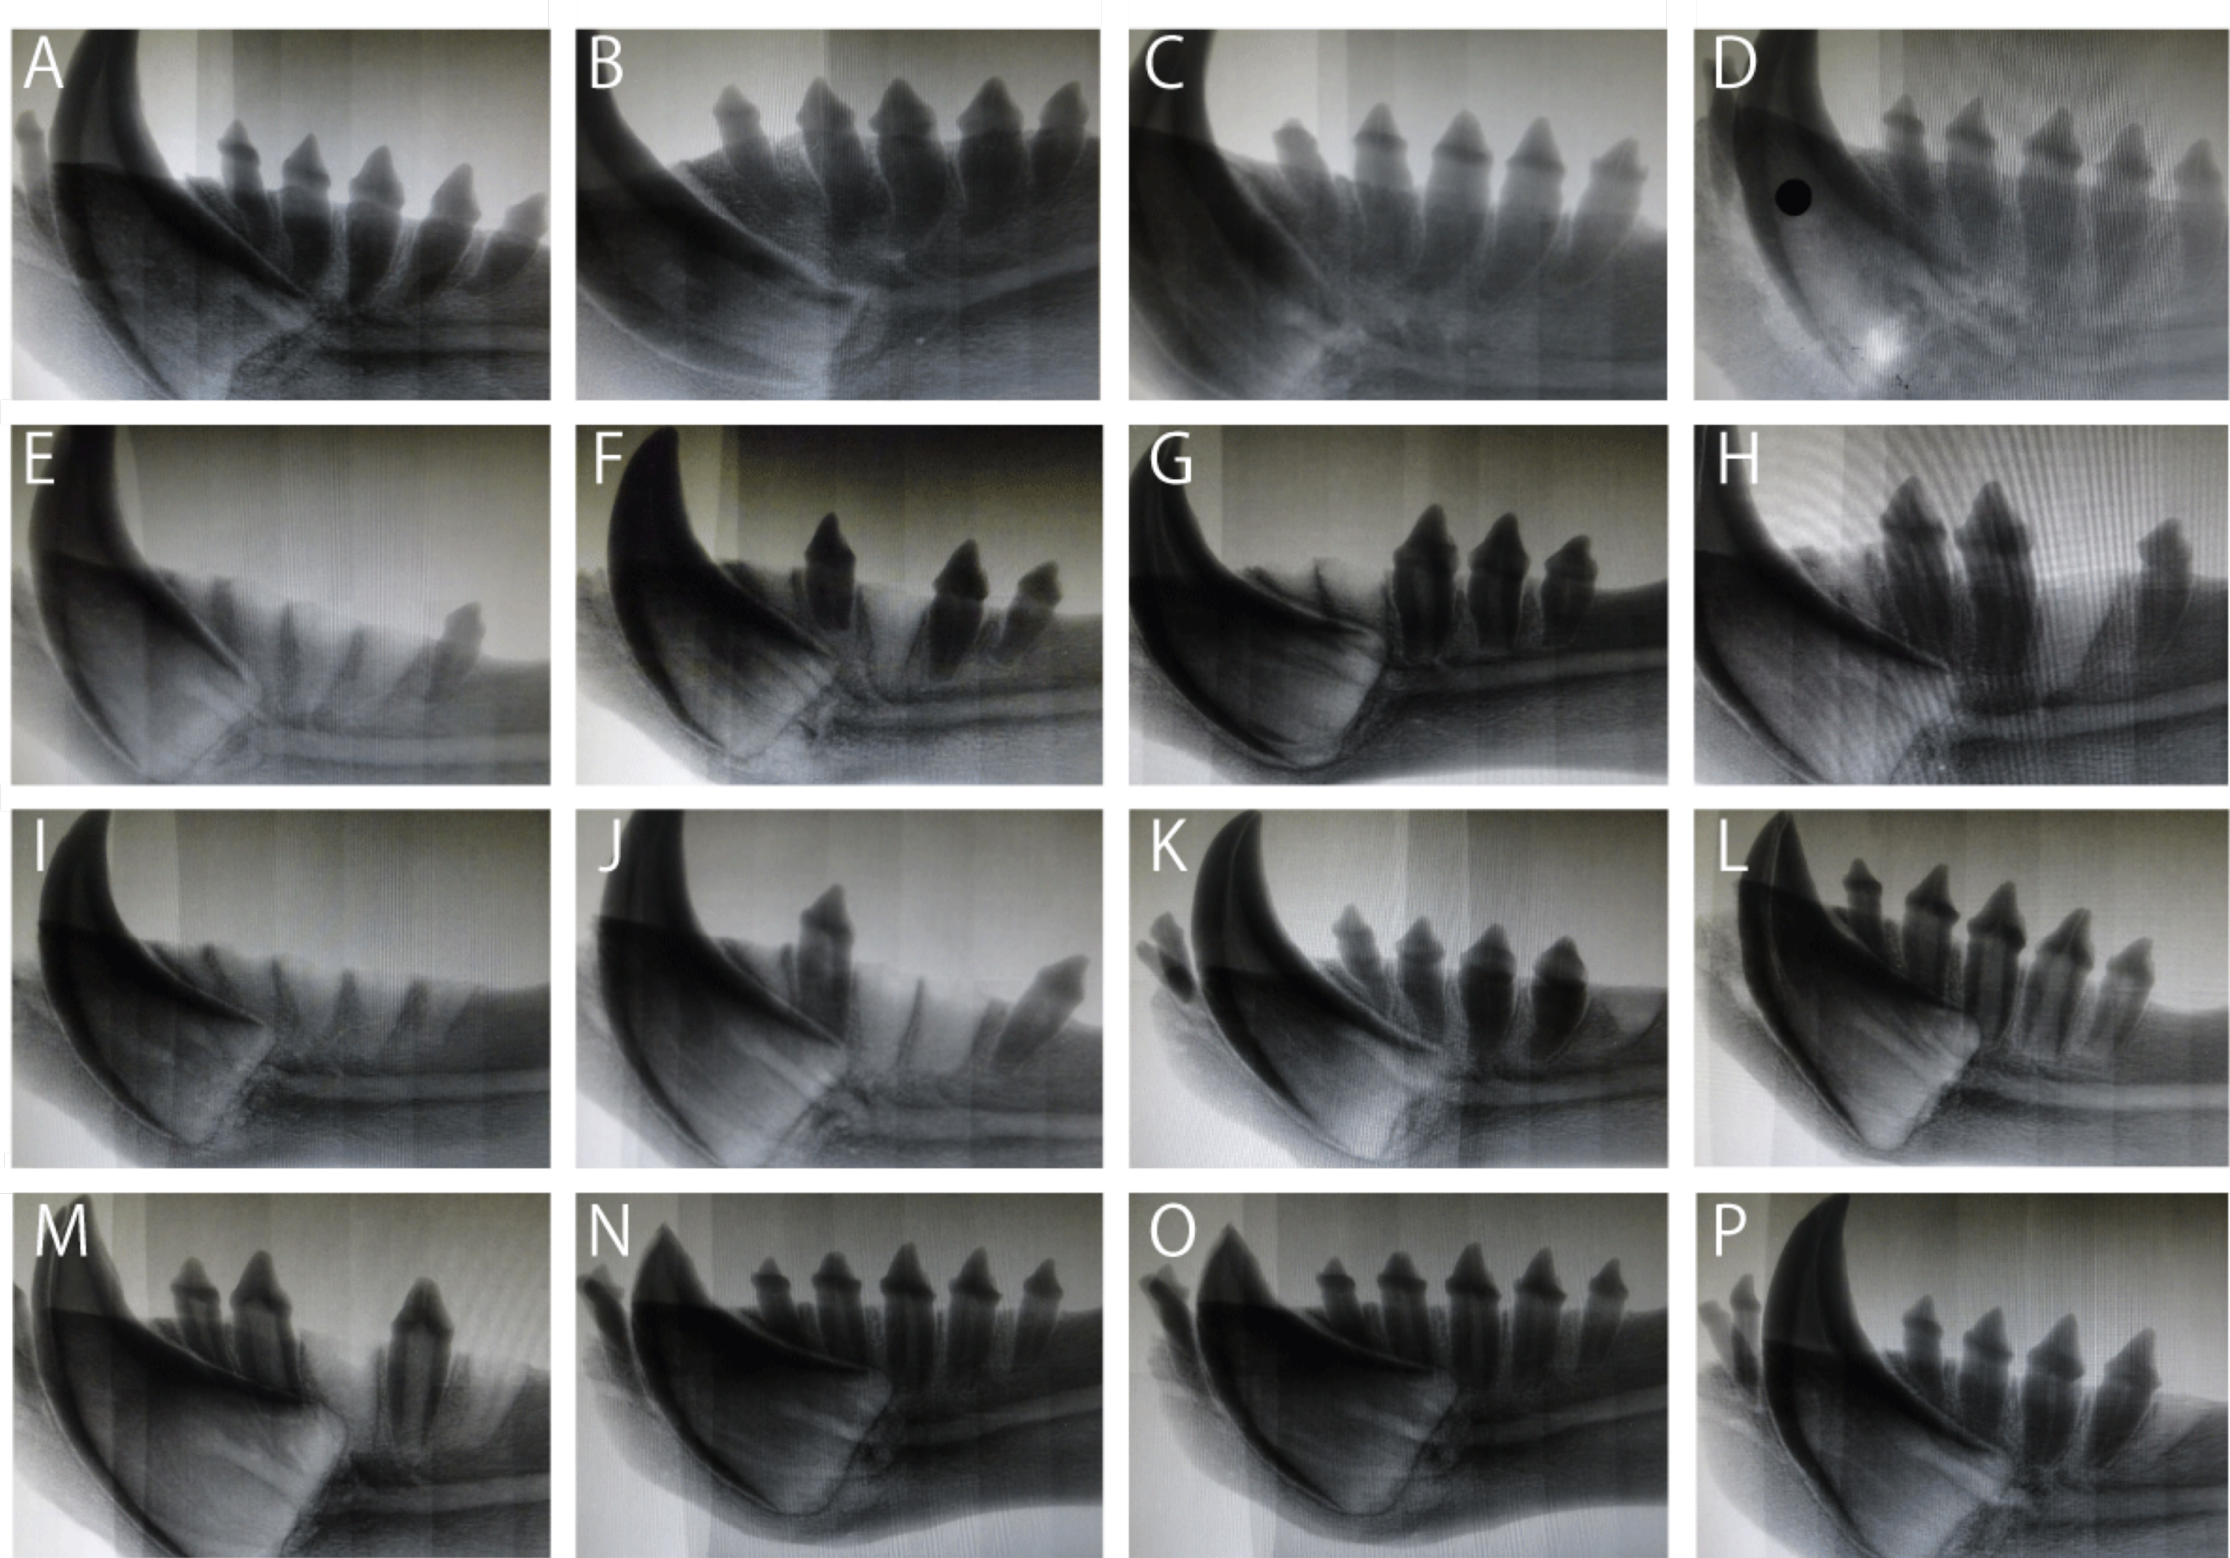

Supplement: Supplemental_Figure_S1.pdf [file Supplemental_Figure_S1.pdf]
